# Supplementary material for: Two-dimensional lanthanide coordination polymer nanosheets for detection of FOX-7
Source: PubMed Central journal article supplement — Chem Sci. 2019 Nov 26;11(4):1032–42. doi: 10.1039/c9sc05403k (PMC8146459; doi:10.1039/c9sc05403k), 2019-11-26
Supplement: SC-011-C9SC05403K-s001.pdf [file SC-011-C9SC05403K-s001.pdf]

## Supplementary information

### Two-dimensional lanthanide coordination polymer nanosheets for detection of FOX-7

Tufan Singha Mahapatra,<sup>\*,§,†</sup> Ananta Dey,<sup>§,‡</sup> Harwinder Singh,<sup>§,‡</sup> Sk Saddam Hossain,<sup>||</sup> Amal Kumar Mandal,<sup>\*,§</sup> and Amitava Das<sup>\*,§</sup>

<sup>§</sup>Analytical and Environmental Science Division and Centralized Instrument Facility, CSIR-Central Salt & Marine Chemicals Research Institute, Bhavnagar 364002, Gujarat, India.

<sup>‡</sup>Academy of Scientific and Innovative Research (AcSIR), Ghaziabad – 201002, India

<sup>||</sup>School of Chemistry, University of Hyderabad, Hyderabad 500 046, India

<sup>†</sup>ICFAI Science School (Chemistry), ICFAI University, Agartala -799210, Tripura (W)

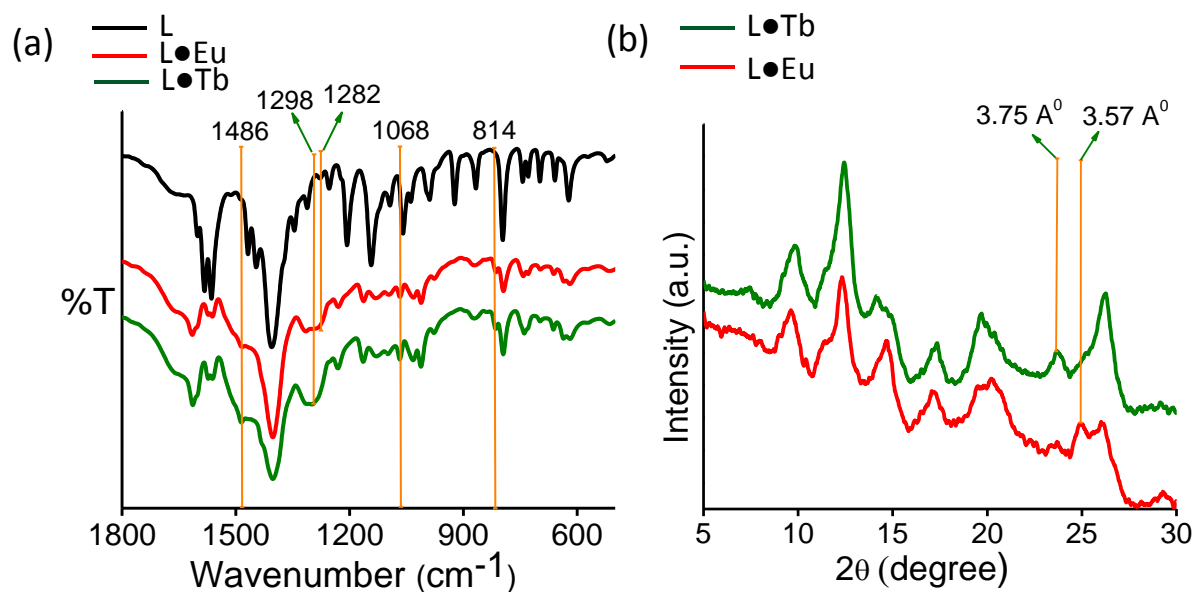

**Fig. S1.** Comparison of (a) FT-IR spectra of L, L•Eu and L•Tb and (b) PXRD patterns of L•Eu and L•Tb coordination polymers.

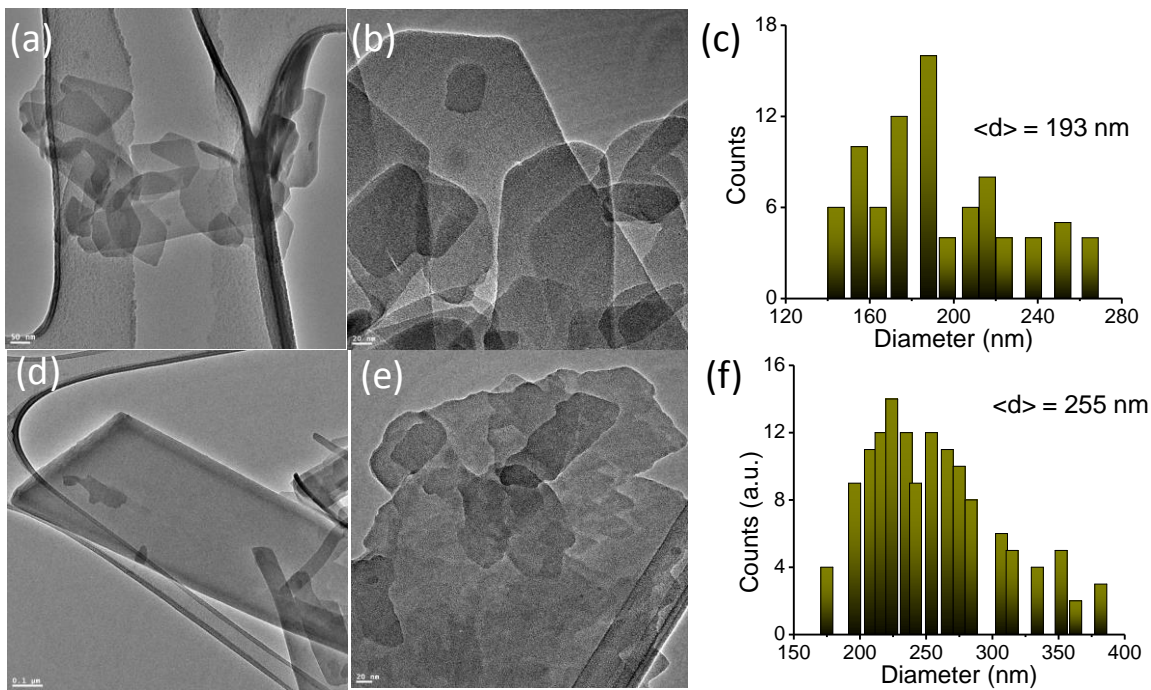

**Fig. S2.** (a-b) TEM images of the L•Eu 2D nanosheets on the lacey-carbon supported copper TEM grids, (d-e) TEM images of the L•Tb nanosheets. (c-f) The statistical analysis of TEM images showed that the average diameter of L•Eu and L•Tb nanosheets were around 193 and 255 nm, respectively

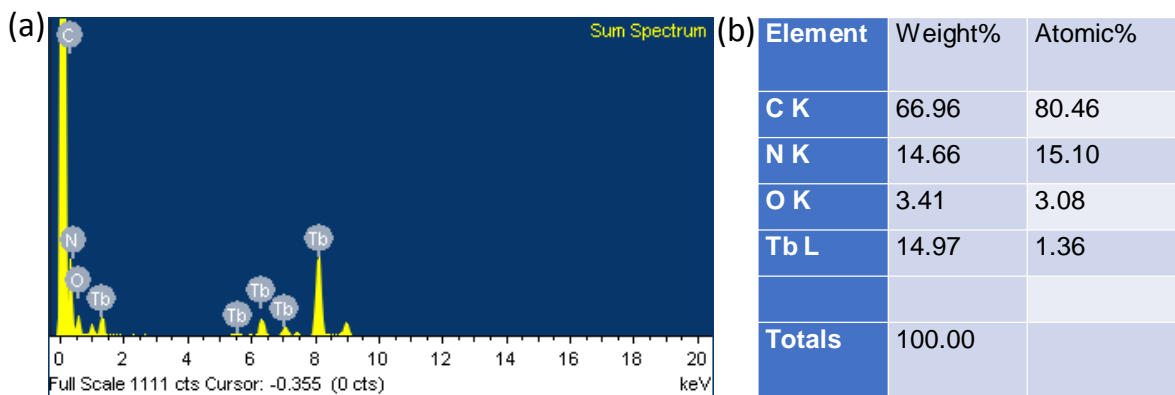

**Fig. S3.** Energy dispersive X-ray spectroscopy (EDXS) analysis with TEM confirmed the presence of C, N, O, and Tb in the L•Tb nanosheets

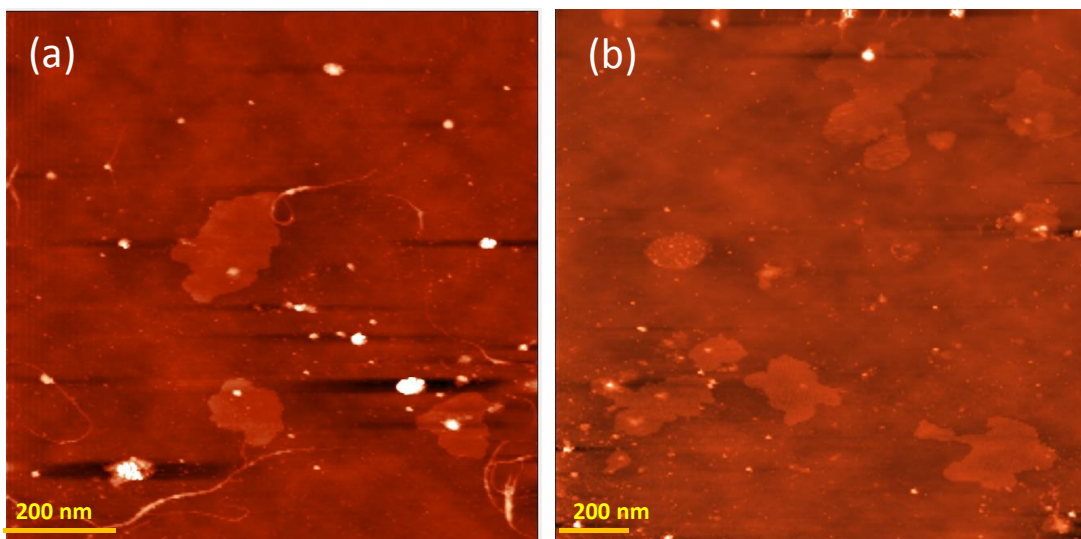

**Fig. S4.** AFM topography (height) scanning images of randomly distributed nanosheets of (a) L•Eu and (b) L•Tb deposited on a silicon wafer.

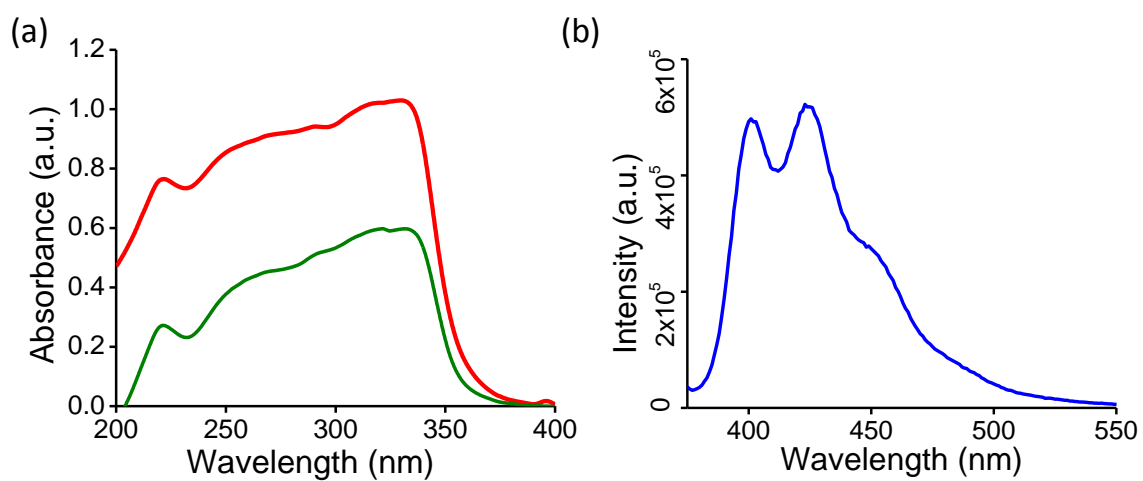

**Fig. S5.** (a) Solid-state UV-vis spectra of the bulk material of L•Eu and L•Tb. (b) The photoluminescent spectra of ligand (L) ( $1.0 \times 10^{-5}$  M in MeCN) upon excitation at 325 nm

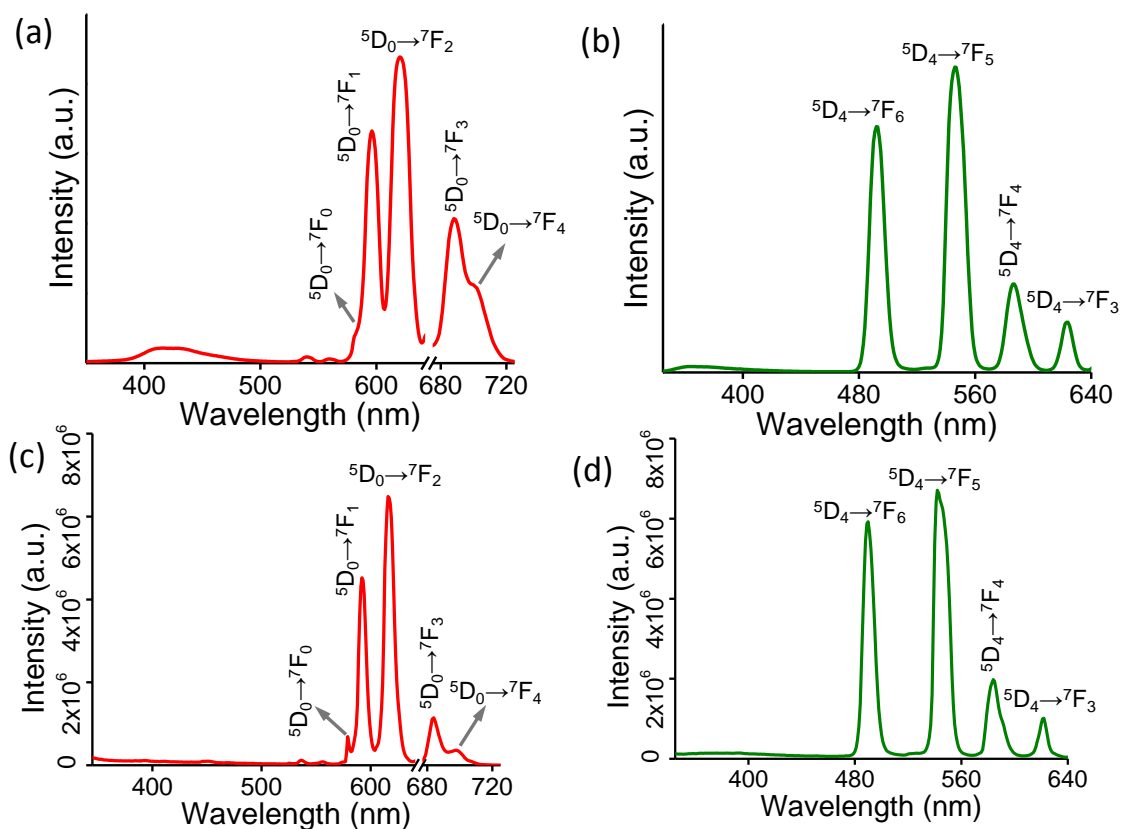

**Fig. S6.** Fluorescence emission spectra of (a) L•Eu and (b) L•Tb bulk coordination polymers in solid state and (c) L•Eu and (d) L•Tb drop-casted nanosheets (2mg/2mL in MeCN) on a glass slide surface ( $\lambda_{\text{ex}} = 325 \text{ nm}$ ).

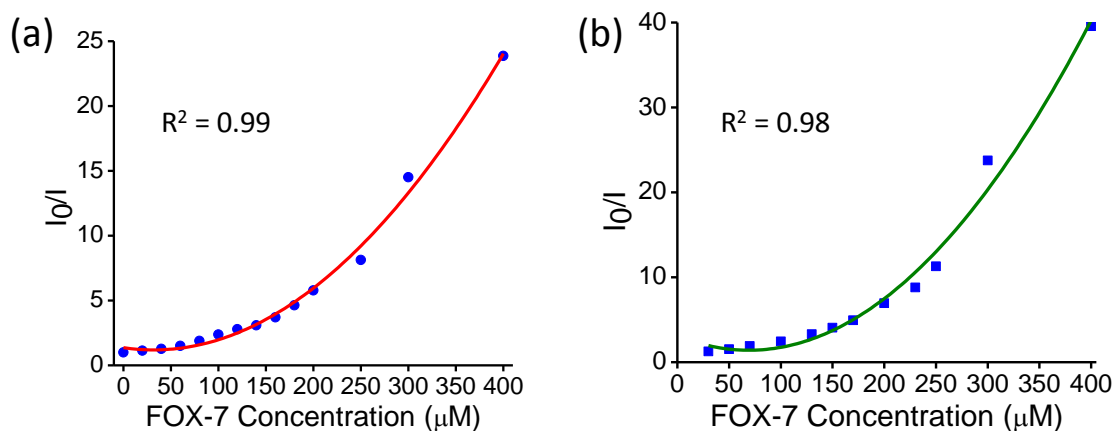

**Fig. S7.** The non-linear Stern-Volmer plots of (a) L•Eu and (b) L•Tb dispersion (2mg/2mL) in MeCN with the concentration of FOX-7 in the range of 0–400  $\mu\text{M}$ .

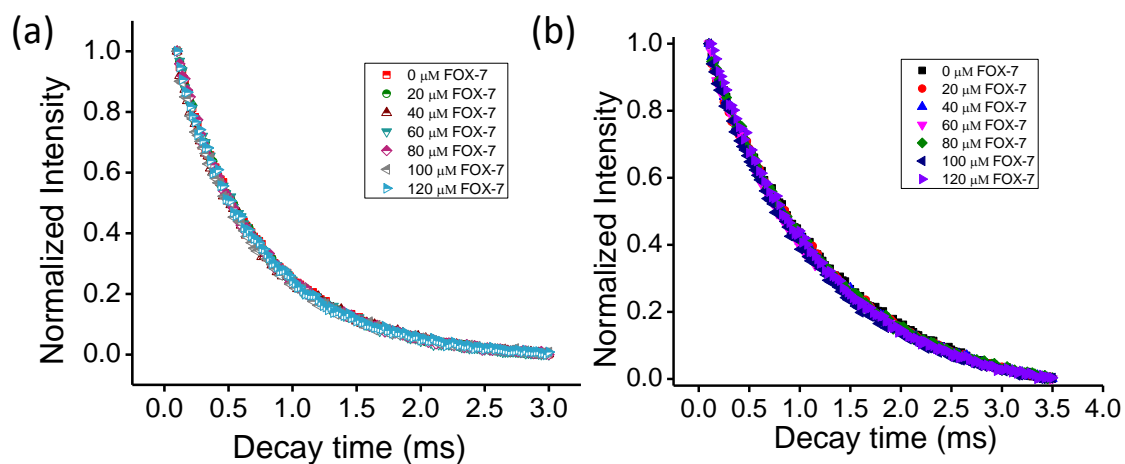

**Fig. S8.** Fluorescence decay curves of (a) L•Eu and (b) L•Tb dispersion (2mg/2mL) in MeCN with different FOX-7 concentrations (0–120  $\mu$ M) monitoring at 618 and 544 nm, respectively. Excitation at 325 nm

**Table S1.** Fluorescence decay experiments of L•Eu dispersion with different FOX-7 concentrations monitoring at 618 nm. Excitation at 325 nm.

| Sl No | L•Eu (2mg/2 mL MeCN) | MeCN     | FOX-7 (MeCN) | Total amount of solution | Concentration of FOX-7 ( $\mu$ M) | Lifetime (ms) |
|-------|----------------------|----------|--------------|--------------------------|-----------------------------------|---------------|
| 1.    | 30 $\mu$ L           | 2.970 mL | 0 $\mu$ L    | 3 mL                     | 0 $\mu$ M                         | 0.66492       |
| 2.    | 30 $\mu$ L           | 2.910 mL | 60 $\mu$ L   | 3 mL                     | 20 $\mu$ M                        | 0.65526       |
| 3.    | 30 $\mu$ L           | 2.850 mL | 120 $\mu$ L  | 3 mL                     | 40 $\mu$ M                        | 0.65216       |
| 4.    | 30 $\mu$ L           | 2.790 mL | 180 $\mu$ L  | 3 mL                     | 60 $\mu$ M                        | 0.65052       |
| 5.    | 30 $\mu$ L           | 2.730 mL | 240 $\mu$ L  | 3 mL                     | 80 $\mu$ M                        | 0.63822       |
| 6.    | 30 $\mu$ L           | 2.670 mL | 300 $\mu$ L  | 3 mL                     | 100 $\mu$ M                       | 0.64505       |
| 7.    | 30 $\mu$ L           | 2.610 mL | 360 $\mu$ L  | 3 mL                     | 120 $\mu$ M                       | 0.65098       |

**Table S2.** Fluorescence decay experiments of L•Tb dispersion with different FOX-7 concentrations monitoring at 544 nm. Excitation at 325 nm.

| Sl No | L•Tb (2mg/2 mL MeCN) | MeCN     | FOX-7 (MeCN) | Total amount of solution | Concentration of FOX-7 ( $\mu$ M) | Lifetime (ms) |
|-------|----------------------|----------|--------------|--------------------------|-----------------------------------|---------------|
| 1.    | 30 $\mu$ L           | 2.970 mL | 0 $\mu$ L    | 3 mL                     | 0 $\mu$ M                         | 1.21917       |
| 2.    | 30 $\mu$ L           | 2.910 mL | 60 $\mu$ L   | 3 mL                     | 20 $\mu$ M                        | 1.21188       |
| 3.    | 30 $\mu$ L           | 2.850 mL | 120 $\mu$ L  | 3 mL                     | 40 $\mu$ M                        | 1.16068       |
| 4.    | 30 $\mu$ L           | 2.790 mL | 180 $\mu$ L  | 3 mL                     | 60 $\mu$ M                        | 1.1205        |
| 5.    | 30 $\mu$ L           | 2.730 mL | 240 $\mu$ L  | 3 mL                     | 80 $\mu$ M                        | 1.15487       |
| 6.    | 30 $\mu$ L           | 2.670 mL | 300 $\mu$ L  | 3 mL                     | 100 $\mu$ M                       | 1.10019       |
| 7.    | 30 $\mu$ L           | 2.610 mL | 360 $\mu$ L  | 3 mL                     | 120 $\mu$ M                       | 1.10872       |

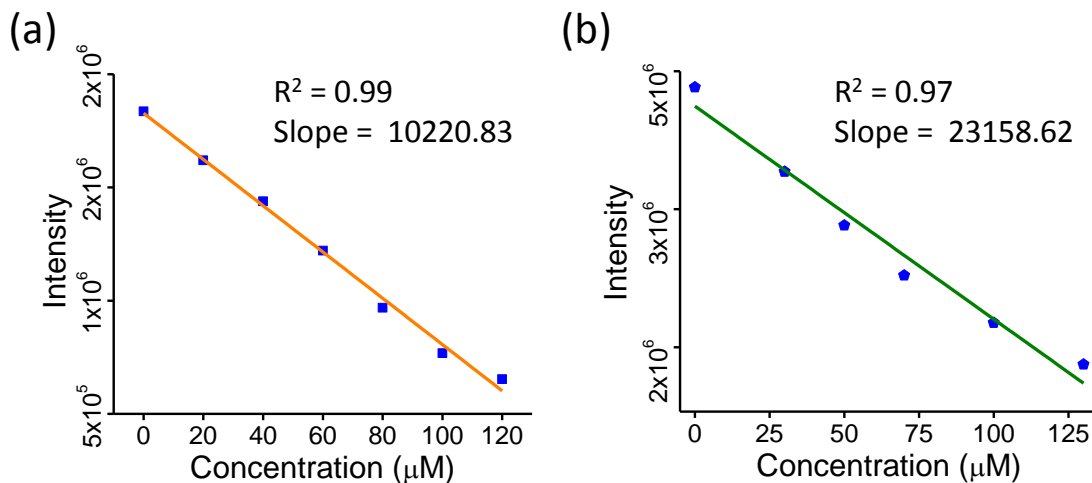

**Fig. S9.** Initial linear region of the fluorescence intensity of L•Eu and L•Tb dispersion (2mg/2mL) in MeCN with varying the concentration of FOX-7.

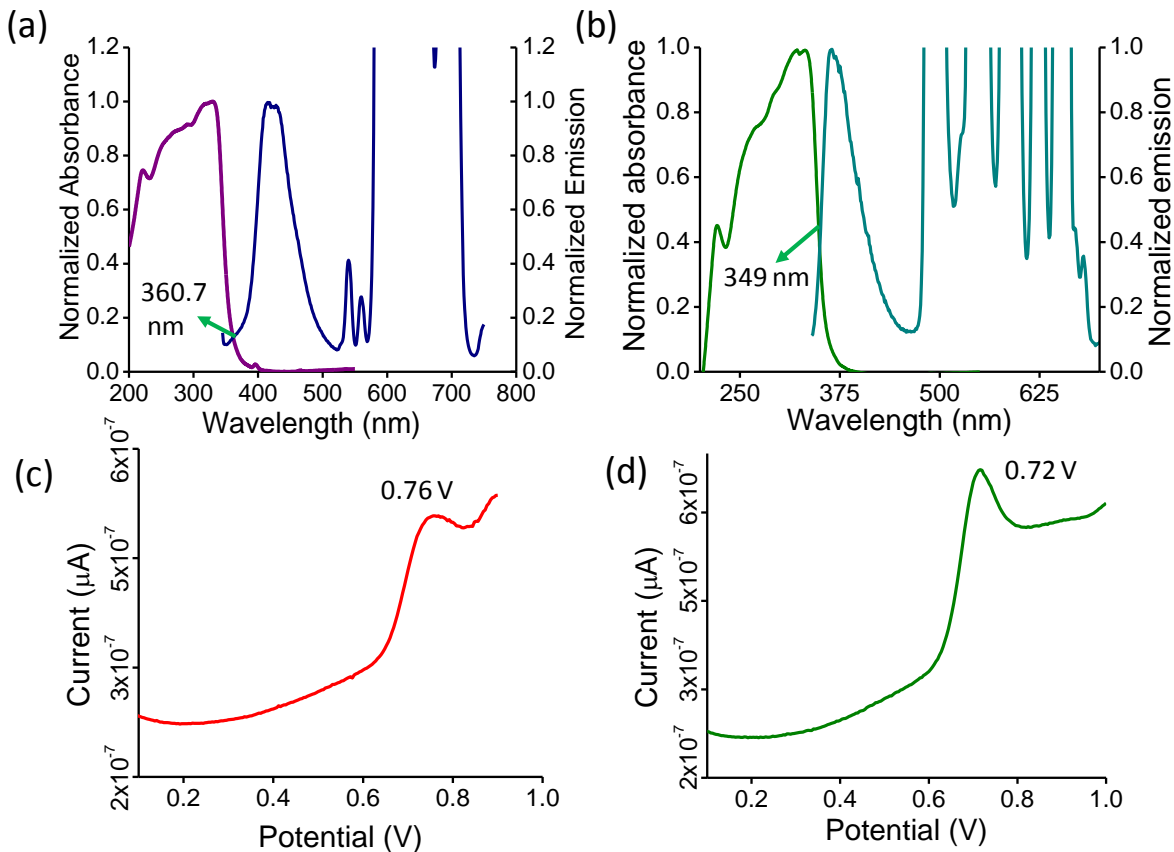

**Fig. S10.** Intersection of the normalized absorption and emission spectra of (a) L•Eu and (b) L•Tb. Differential pulse voltammetry (DPV) spectra for (c) L•Eu and (d) L•Tb in deoxygenated DMF in the presence of 0.1 M TBAPF<sub>6</sub> as supporting electrolyte, by using a Ag/AgCl (saturated KCl) electrode as the reference electrode.

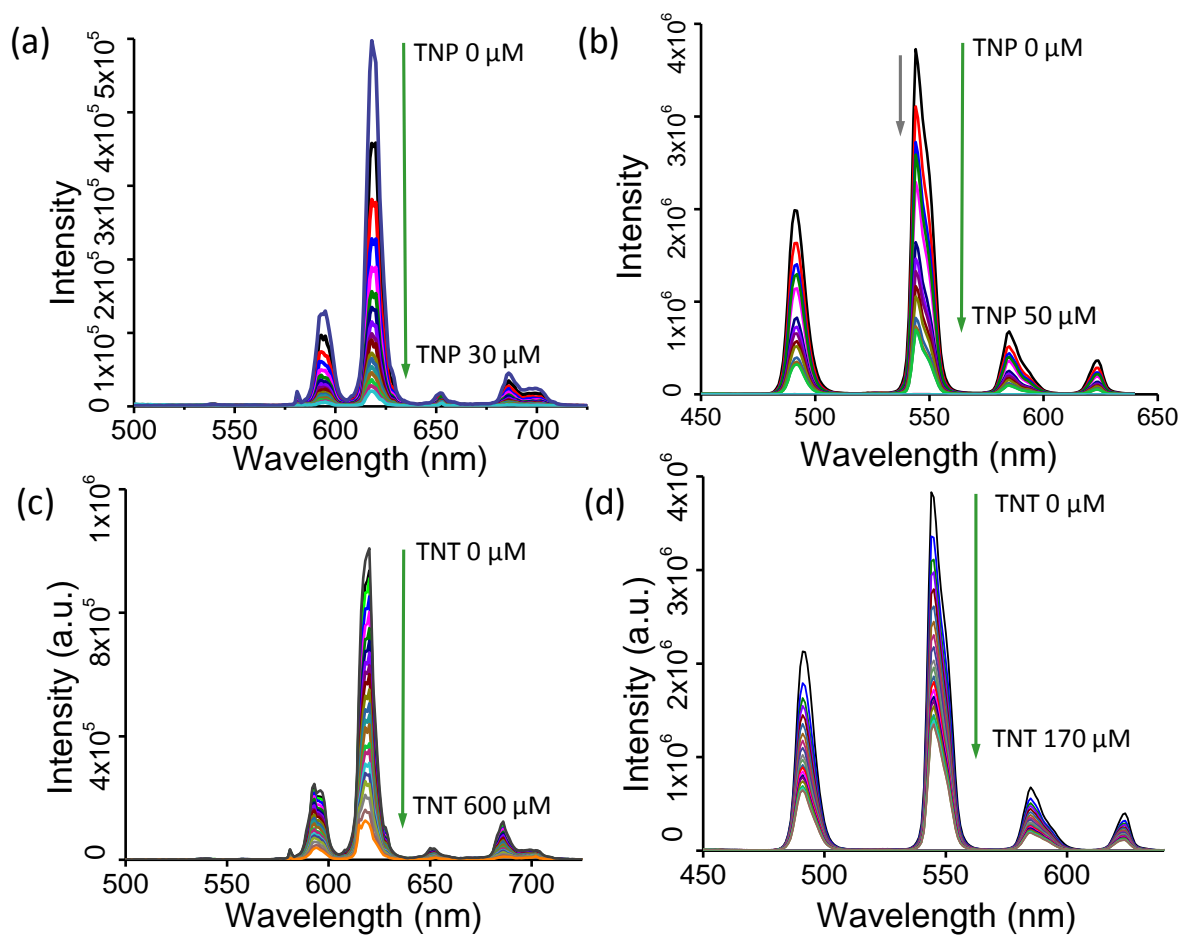

**Fig. S11.** (a and b) Fluorescence spectra of L•Eu and L•Tb nanosheets dispersed in MeCN in the presence of an incremental concentration of TNP ( $\lambda_{\text{ex}} = 325$  nm). (c and d) Fluorescence spectra of L•Eu and L•Tb nanosheets dispersed in MeCN in the presence of an incremental concentration of TNT ( $\lambda_{\text{ex}} = 325$  nm).

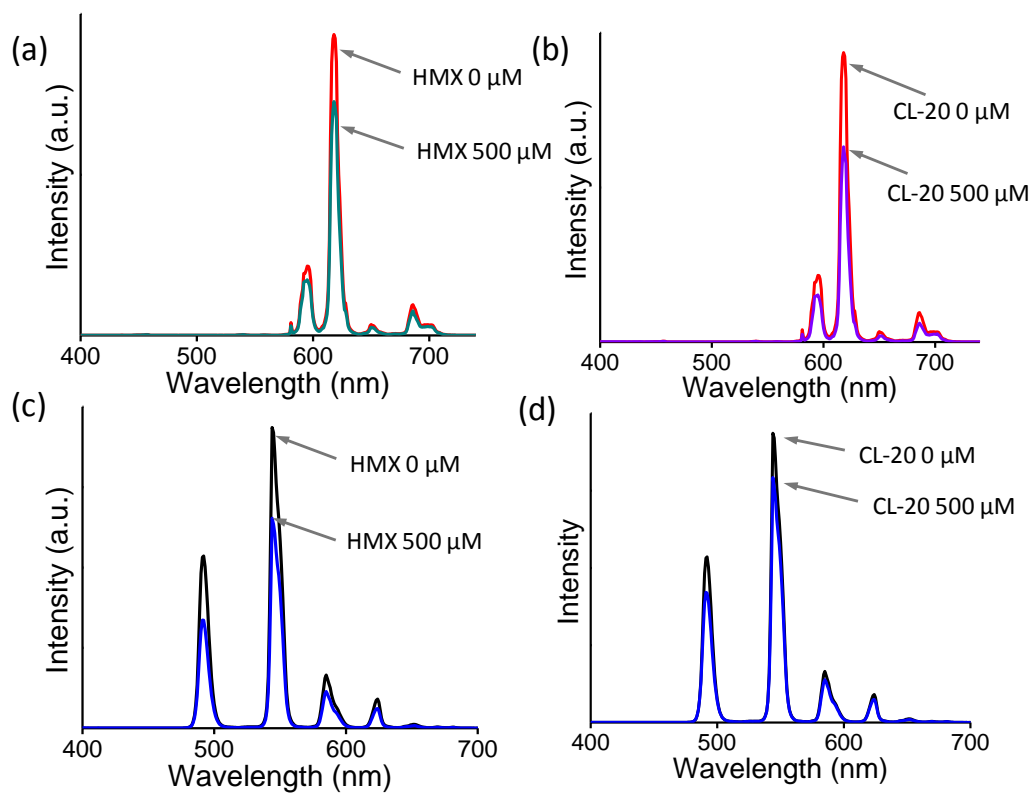

**Fig. S12.** Fluorescence spectra of L•Eu and L•Tb nanosheets dispersed in MeCN in the presence of HMX and CL-20 ( $\lambda_{\text{ex}} = 325 \text{ nm}$ ).

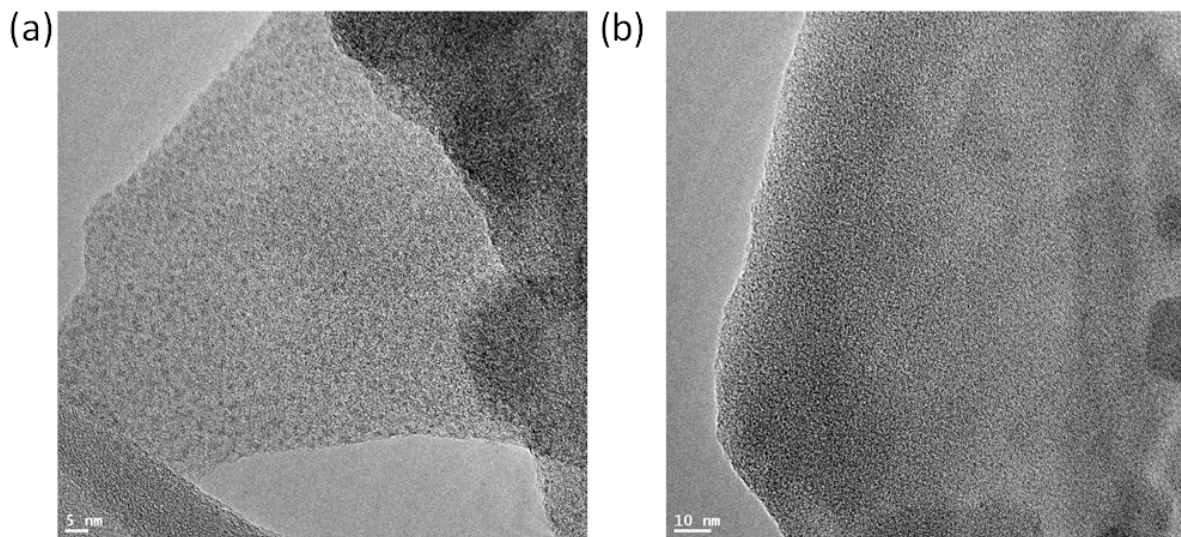

**Fig. S13.** TEM images of the L•Eu and L•Tb 2D nanosheets after treatment of FOX-7 on the lacey-carbon supported copper TE
